# Supplementary material for: A Comparative Study of Binding Interactions between Proteins and Flavonoids in Angelica Keiskei: Stability, α-Glucosidase Inhibition and Interaction Mechanisms
Source: MDPI journal article supplement (doi:10.3390/ijms24076582), 2023-04-01
Supplement: s1 [file s1]

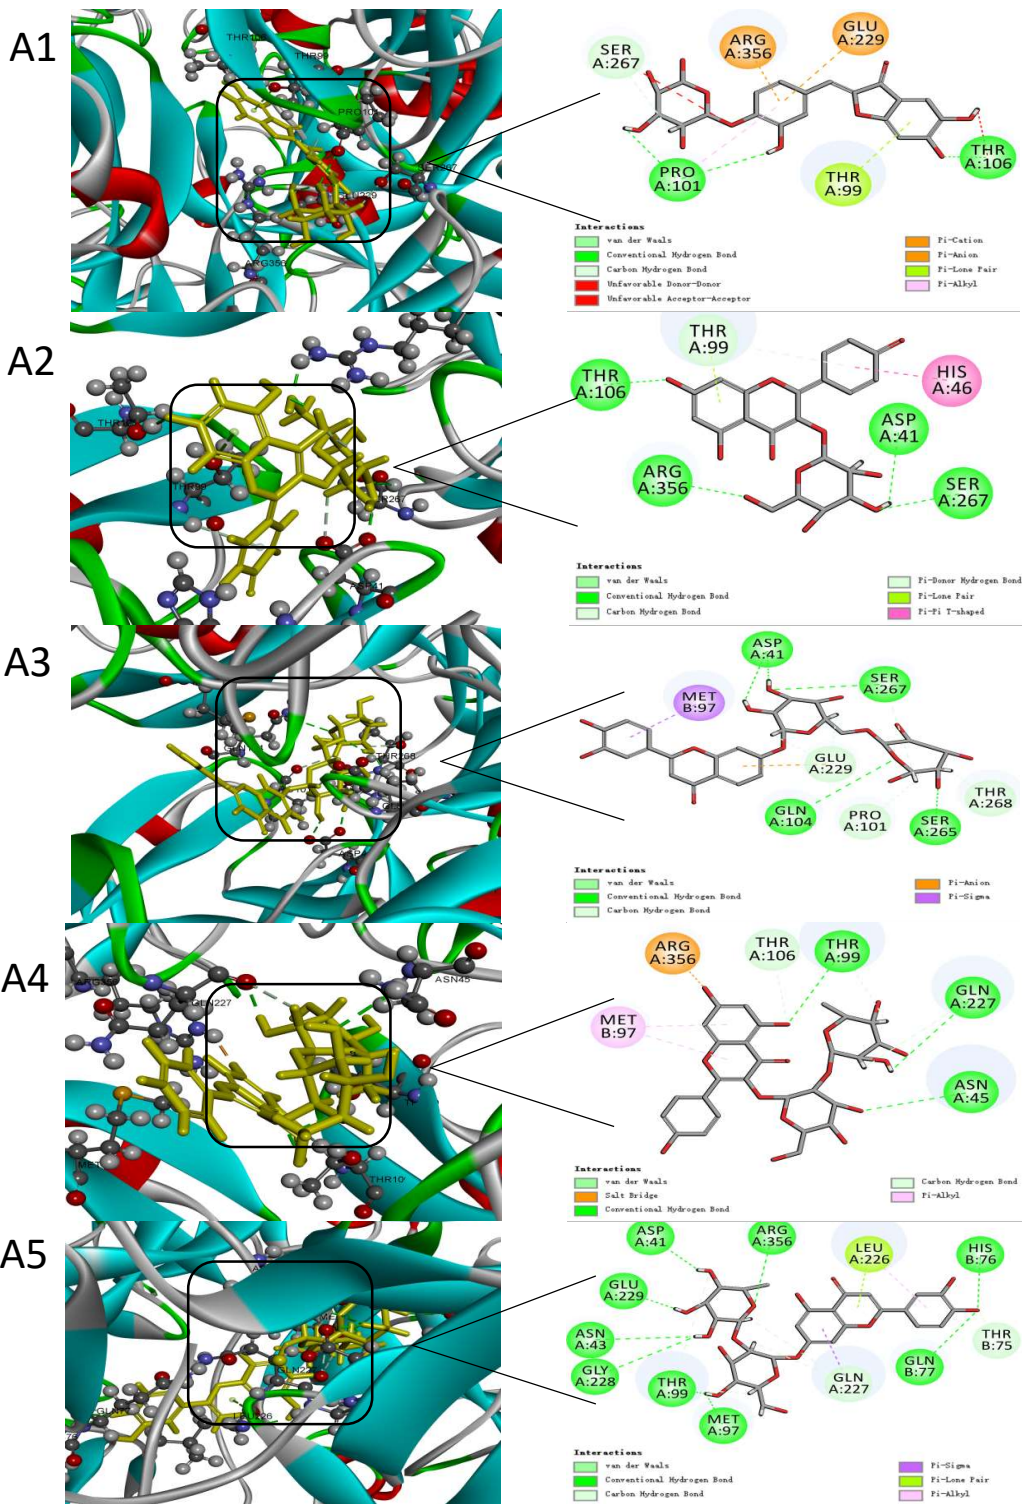

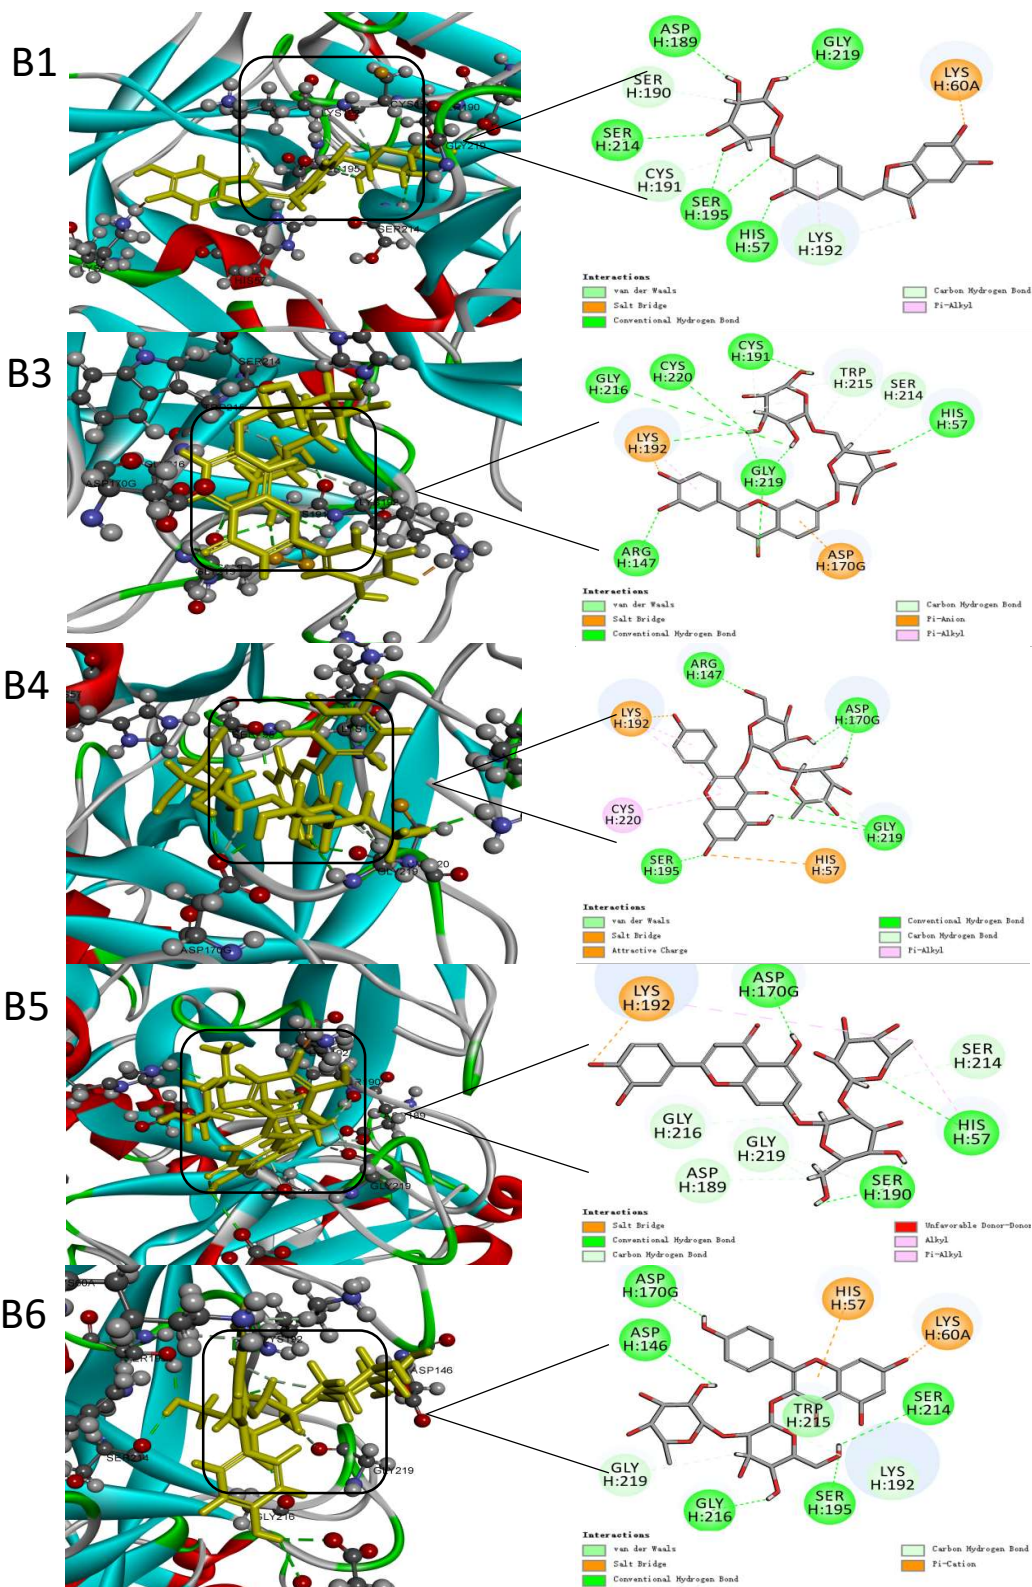

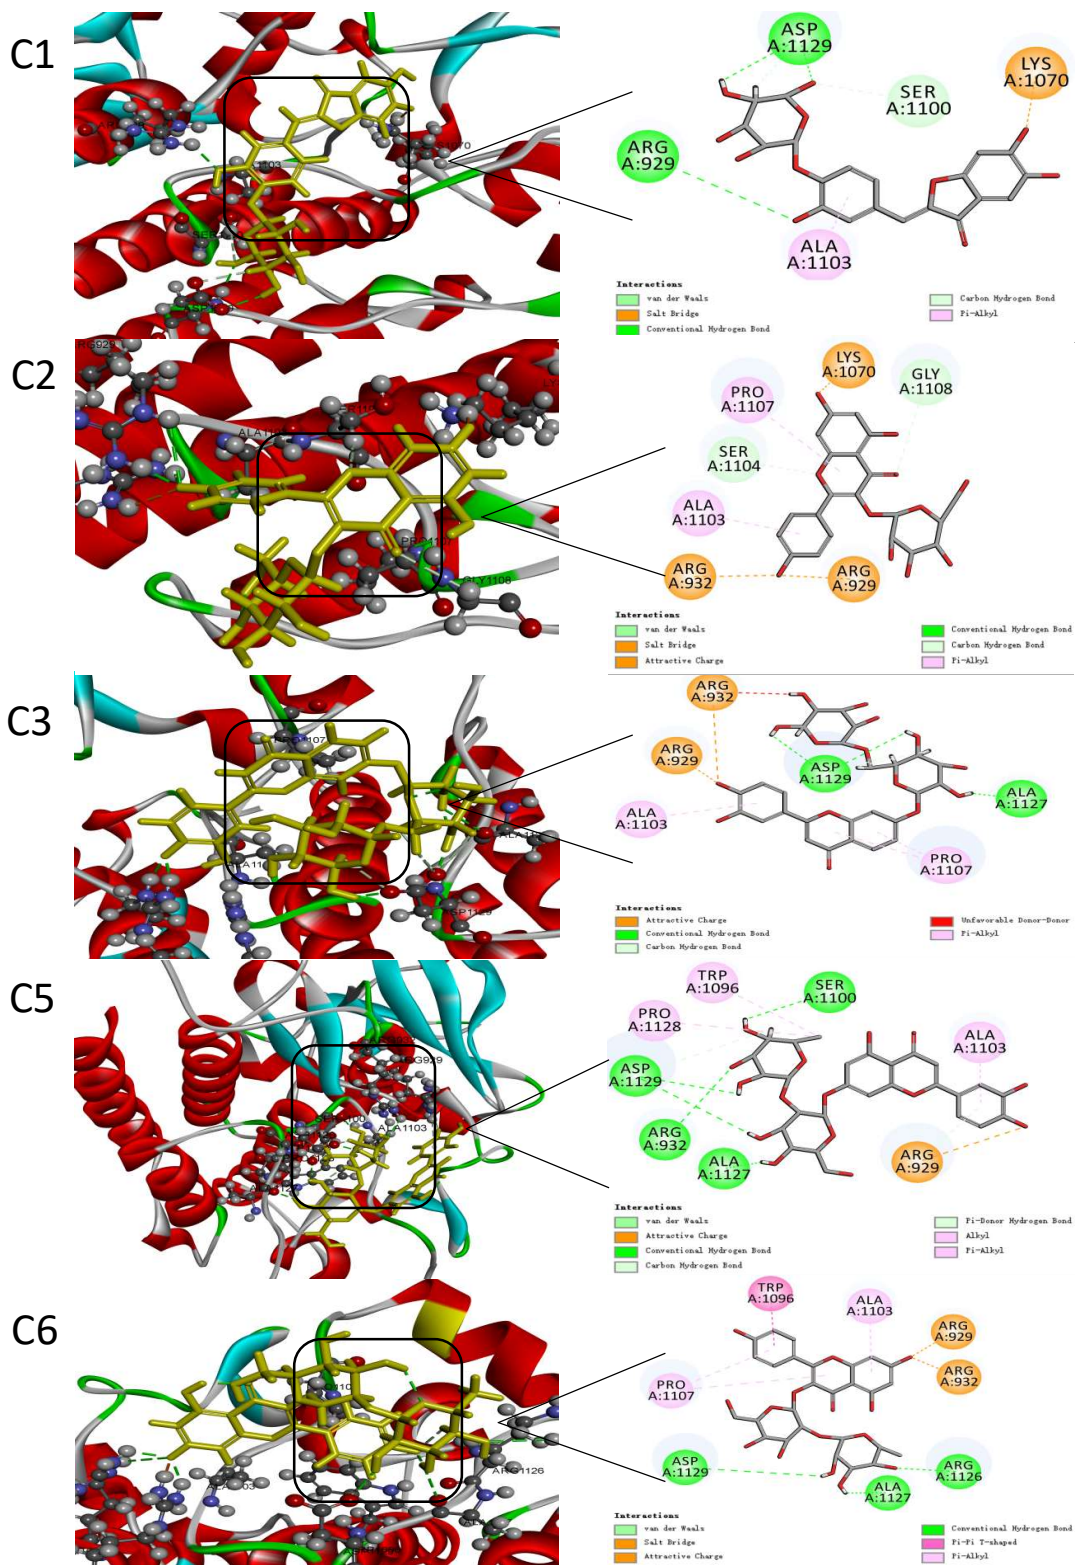

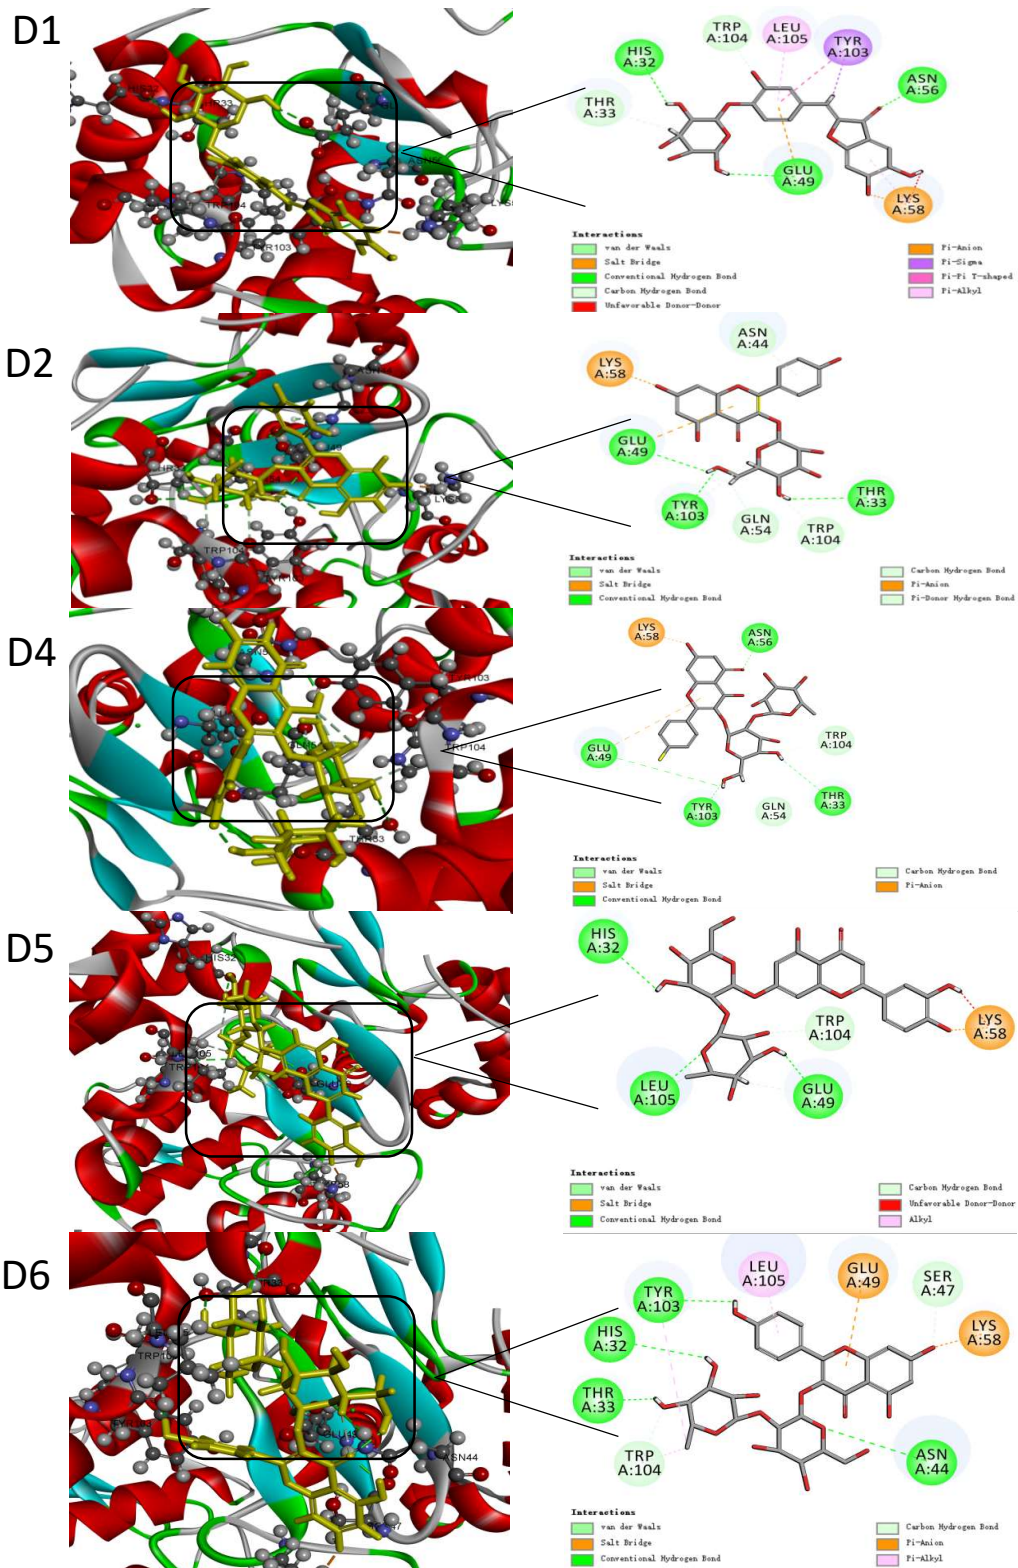

E1

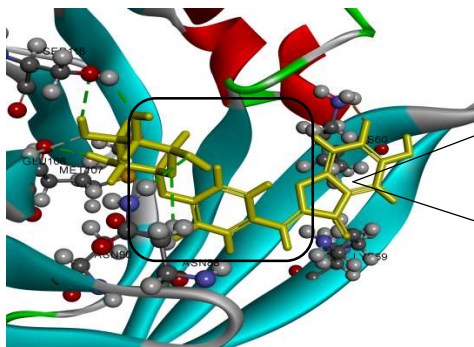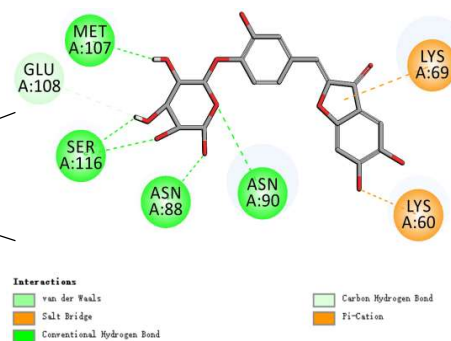

E2

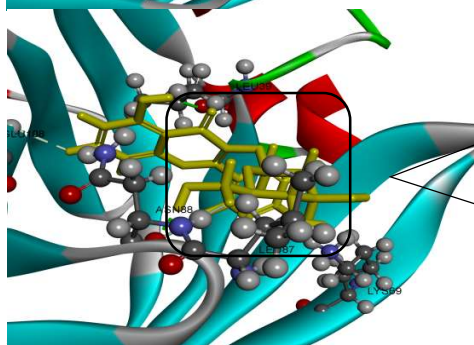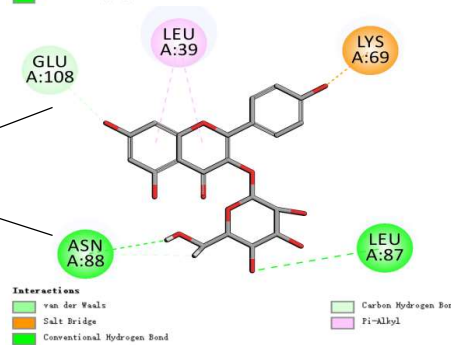

E3

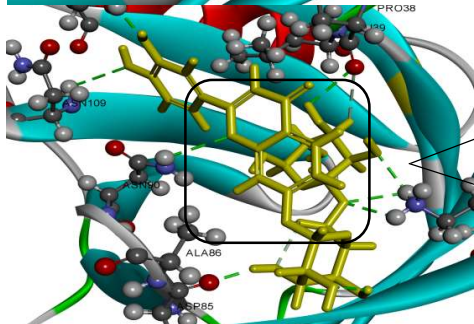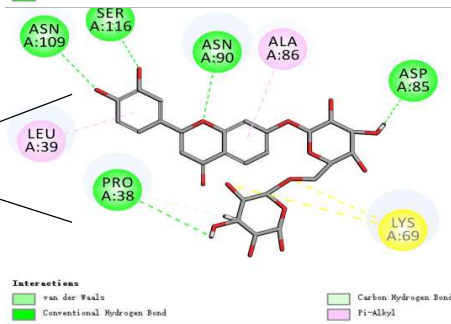

E4

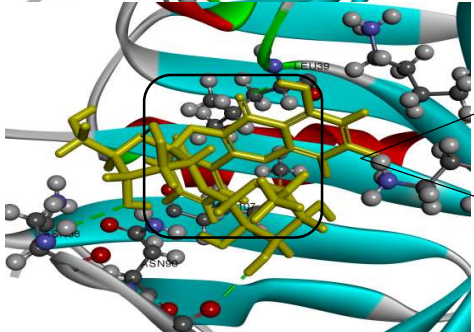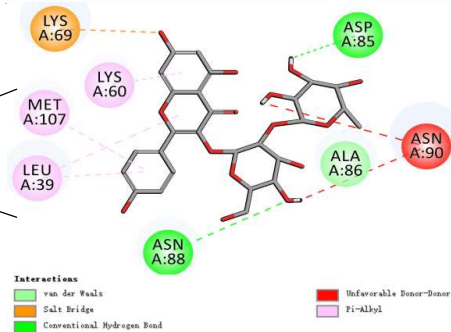

E6

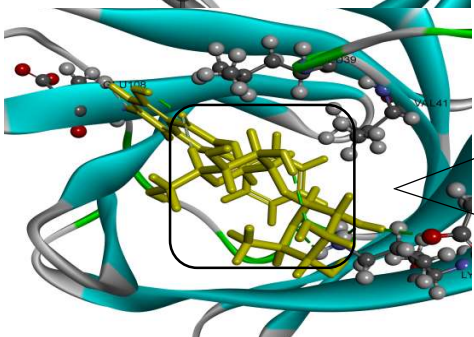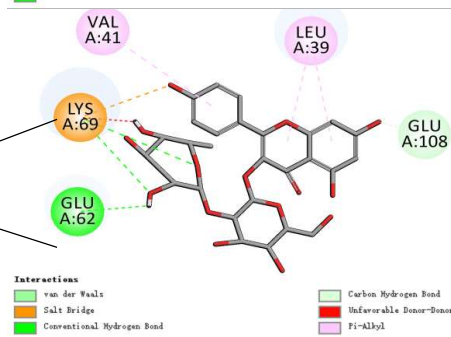

Figure S1. The docking diagrams of the flavonoids(1,2,3,4,5)/SPI(7S) (A), flavonoids(1,3,4,5,6) / SPI(7S) (B), flavonoids(1,2,3,5,6)/BSA (C), flavonoids(1,2,4,5,6)/ $\alpha$ -La (D) and flavonoids(1,2,3,4,6) / $\beta$ -Lg (E) complexes.
